# Supplementary material for: Shockwave Targeting on Subchondral Bone Is More Suitable than Articular Cartilage for Knee Osteoarthritis
Source: PubMed Central journal article supplement — Int J Med Sci. 2019 Jan 1;16(1):156–66. doi: 10.7150/ijms.26659 (PMC6332487; doi:10.7150/ijms.26659), 2019-01-01
Supplement: ijmsv16p0156s1.pdf [file ijmsv16p0156s1.pdf]

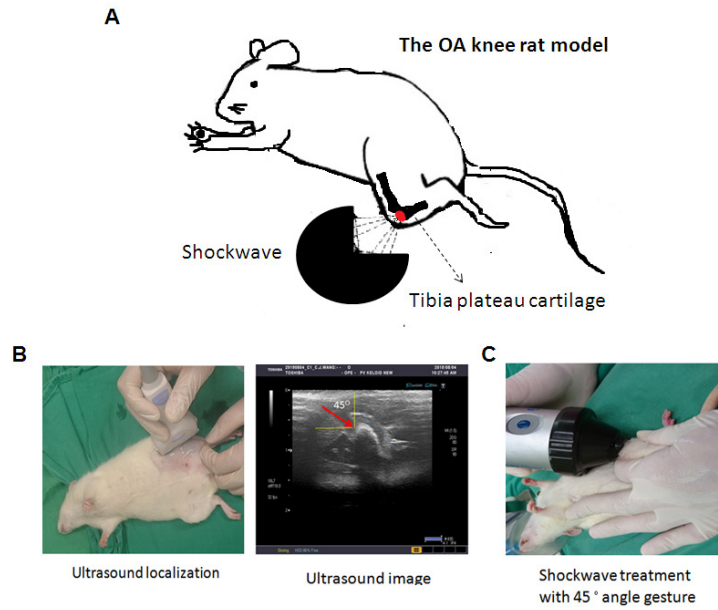

Supplemental Figure 1. The procedure of ESWT application on the tibia cartilage of the rat. **(A)** Diagram of the OA knee of rat which received ESWT on medial tibia plateau cartilage. **(B)** The rat was put into a supine position and the joint was carefully to observe the position of tibia plateau cartilage by an ultrasound machine. The rat was stationed and had the left knee flexed at maximum angle. The ultrasound image of the rat knee with tibia plateau surface exposed and the shockwave probe was placed about 45° position linear to the tibia. **(C)** Application of ESWT on the medial tibia plateau cartilage of the rat knee.
